# Supplementary material for: Photoacoustic in vivo 3D imaging of tumor using a highly tumor-targeting probe under high-threshold conditions
Source: PubMed Central journal article supplement (PMC7652936; doi:10.1038/s41598-020-76281-1), 2020-11-09
Supplement: 41598_2020_76281_MOESM1_ESM.pdf [file 41598_2020_76281_MOESM1_ESM.pdf]

Supplementary Information

for

## **Photoacoustic *In Vivo* 3D Imaging of Tumor Using a Highly Tumor-Targeting Probe under High-Threshold Conditions**

Hisatsugu Yamada<sup>1,†\*</sup>, Natsuki Matsumoto<sup>1</sup>, Takanori Komaki<sup>1</sup>, Hiroaki Konishi<sup>1</sup>, Yu Kimura<sup>1</sup>, Aoi Son<sup>1</sup>, Hirohiko Imai<sup>2</sup>, Tetsuya Matsuda<sup>2</sup>, Yasuhiro Aoyama<sup>1\*</sup>, and Teruyuki Kondo<sup>1\*</sup>

<sup>1</sup>Department of Energy and Hydrocarbon Chemistry, Graduate School of Engineering, Kyoto University, Katsura, Nishikyo-ku, Kyoto 615-8510, Japan, <sup>2</sup>Department of Systems Science, Graduate School of Informatics, Kyoto University, Yoshida-honmachi, Sakyo-ku, Kyoto 606-8501, Japan

\*e-mail: [teruyuki@scl.kyoto-u.ac.jp](mailto:teruyuki@scl.kyoto-u.ac.jp) (T.K.); [aoyama.yasuhiro.78z@st.kyoto-u.ac.jp](mailto:aoyama.yasuhiro.78z@st.kyoto-u.ac.jp) (Y.A.); [yamada.hisatsugu@tokushima-u.ac.jp](mailto:yamada.hisatsugu@tokushima-u.ac.jp) (H.Y.)

<sup>†</sup>Present addresses: Graduate School of Technology, Industrial and Social Sciences, Tokushima University.

## **Contents**

- 1. Preparation and properties of 800RS-PMPC and ICG-PMPC**
- 2. MTT assay of the cytotoxicity of 800RS-PMPC**
- 3. QCM analysis of the interaction of 800RS-PMPC and ICG-PMPC with BSA**
- 4. PA imaging of tumor-bearing mice treated with ICG-PMPC**
- 5. *Ex vivo* fluorescence imaging of tumor-bearing mice treated with 800RS-PMPC and ICG-PMPC**
- 6. References**

## 1. Preparation and properties of 800RS-PMPC and ICG-PMPC

Scheme S1.

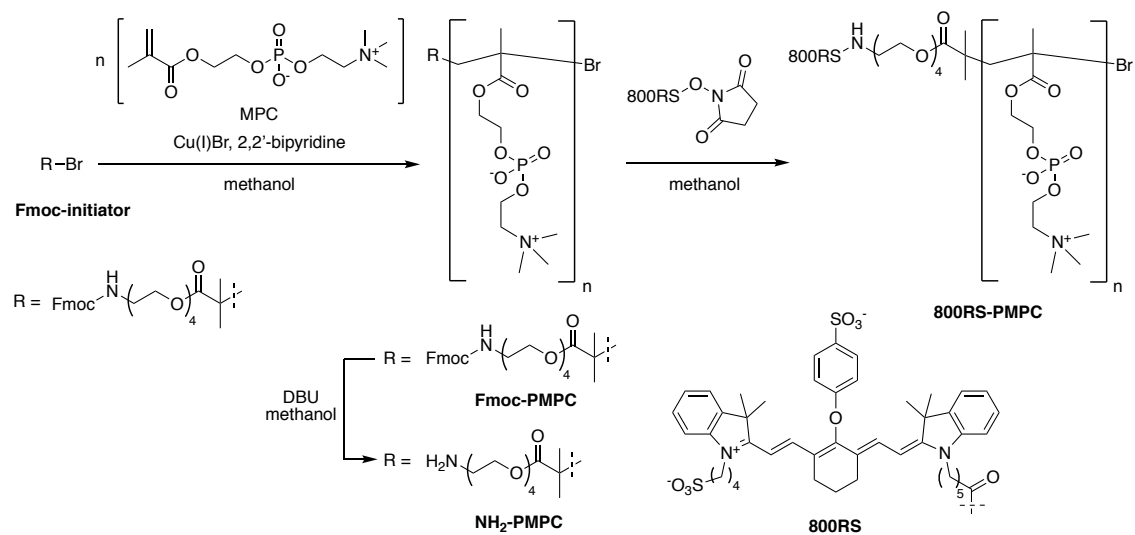

The <sup>1</sup>H NMR spectra for Fmoc-PMPC, NH<sub>2</sub>-PMPC, 800RS-PMPC, and ICG-PMPC, and the absorption spectra for 800RS-PMPC and 800RS are shown below in Figs. S1–S5.

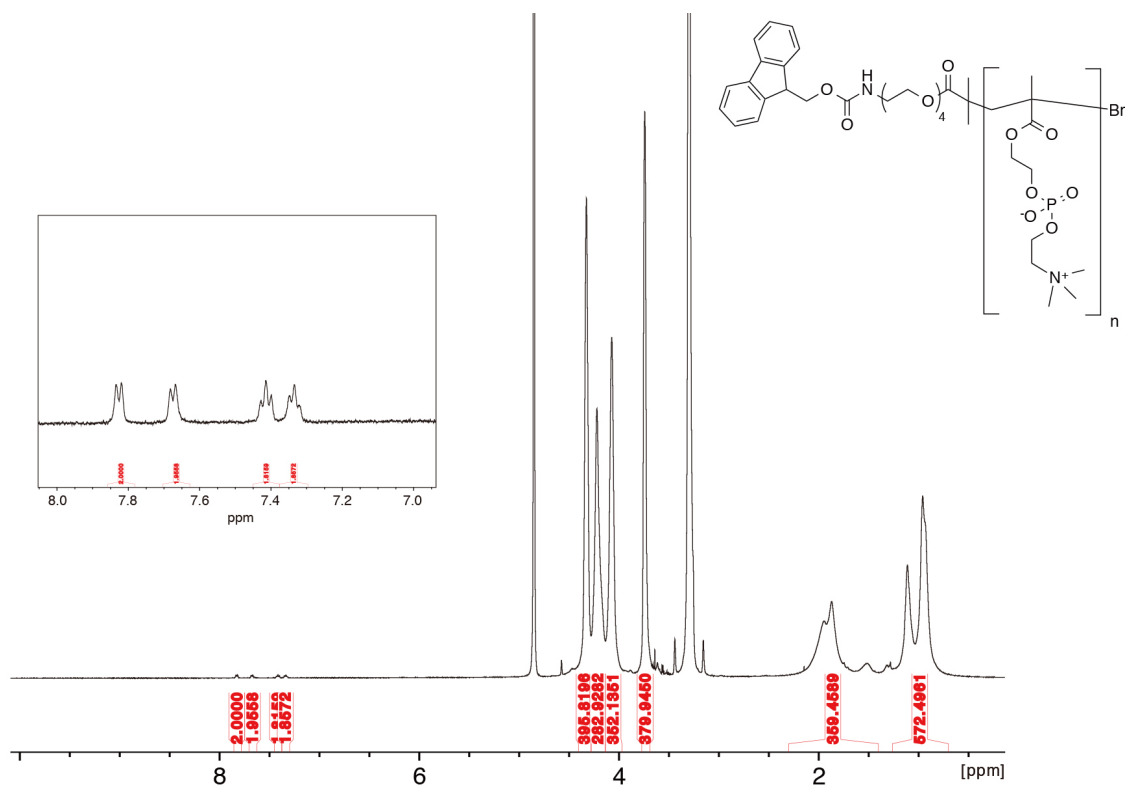

**Figure S1.**  $^1\text{H}$  NMR spectrum of Fmoc-PMPC ( $M_n = 54,000$ ) in  $\text{CD}_3\text{OD}$  (500 MHz). The inset shows the 7.0–8.0 ppm region for the Fmoc aromatic protons.

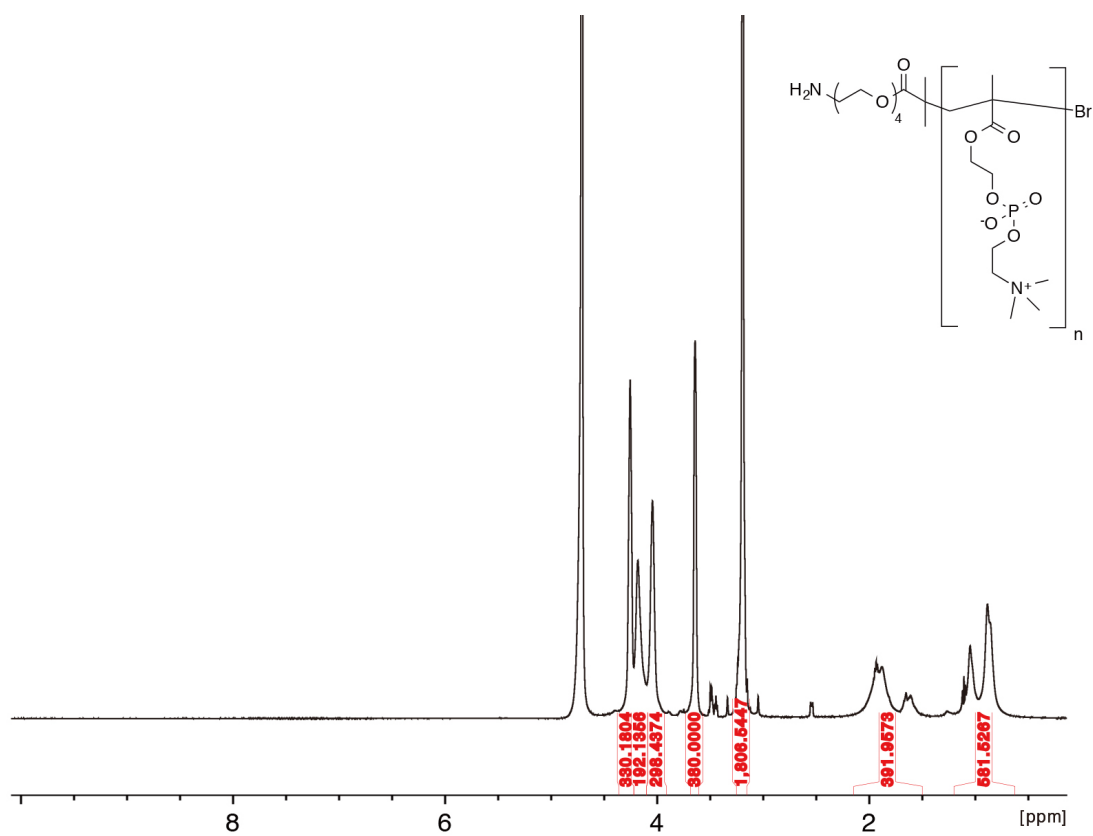

**Figure S2.** <sup>1</sup>H NMR spectrum of NH<sub>2</sub>-PMPC ( $M_n = 54,000$ ) in D<sub>2</sub>O (500 MHz).

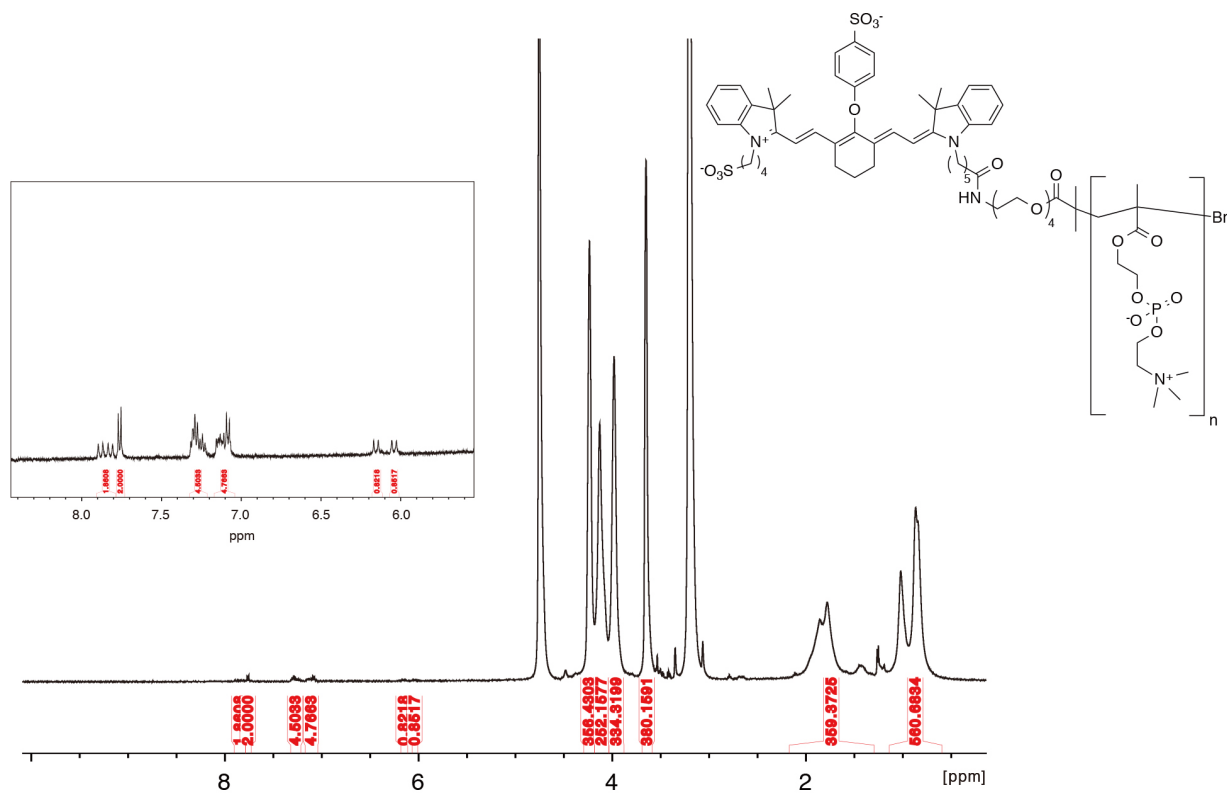

**Figure S3.**  $^1\text{H}$  NMR spectrum of 800RS-PMPC ( $M_n = 56,000$ ) in  $\text{CD}_3\text{OD}$  (500 MHz). The inset shows the 5.5–8.5 ppm region for the aromatic and olefinic protons of 800RS.

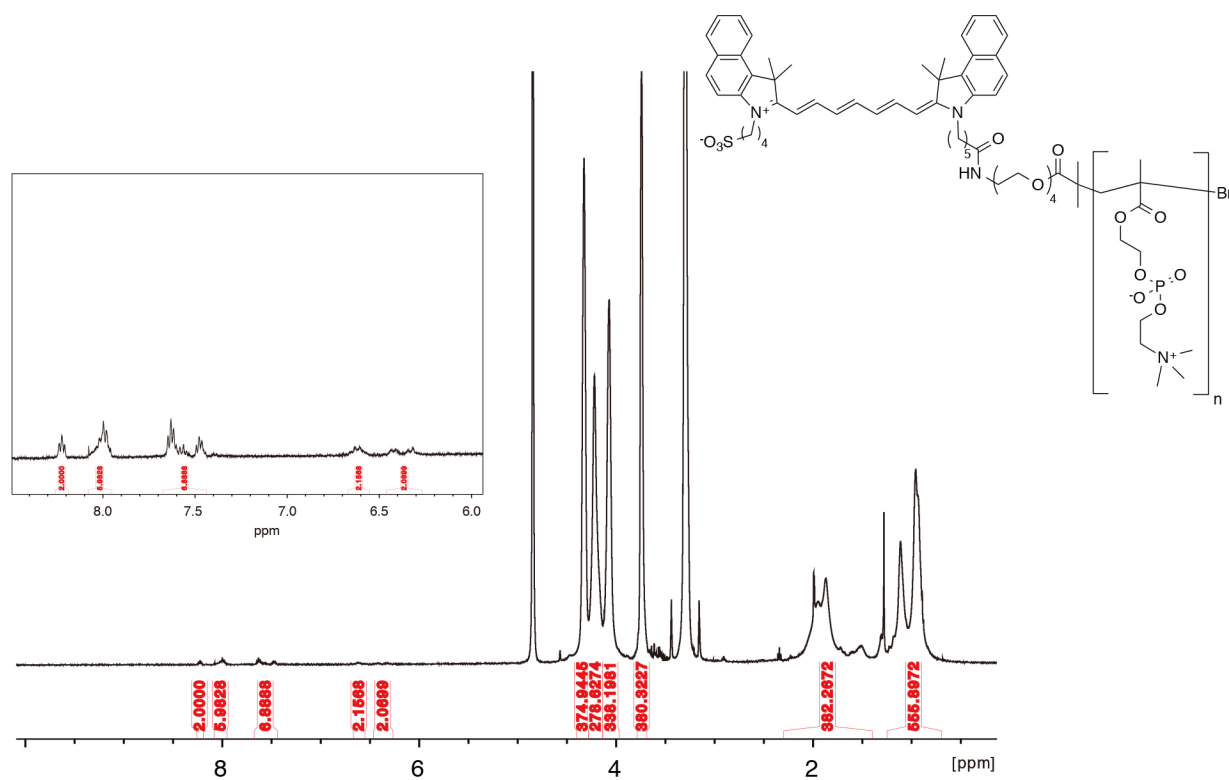

**Figure S4.** <sup>1</sup>H NMR spectrum of ICG-PMPC ( $M_n = 55,000$ ) in CD<sub>3</sub>OD (500 MHz). The inset shows the 6.0–8.5 ppm region for the aromatic and olefinic protons of ICG.

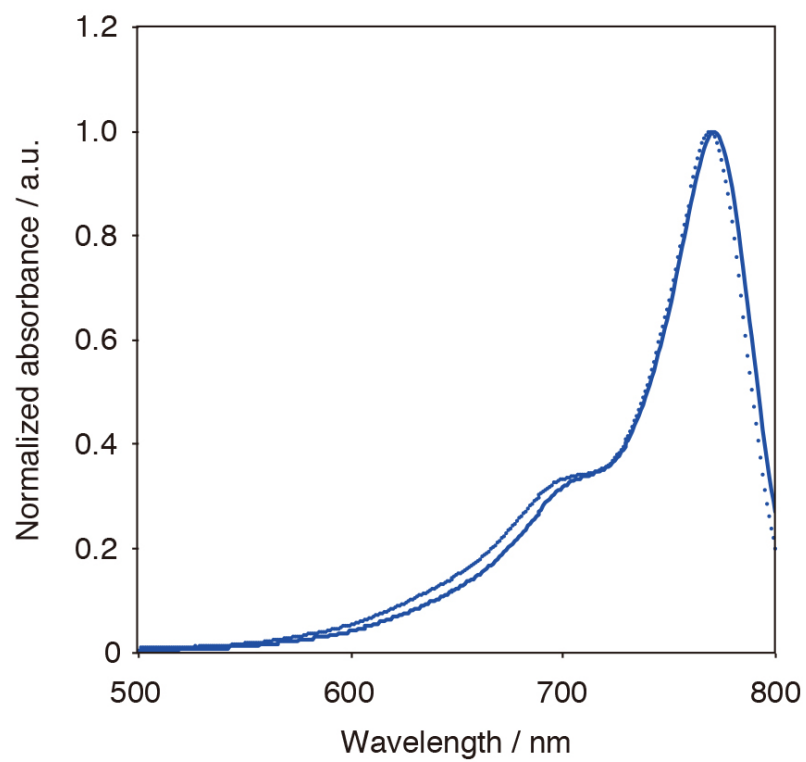

**Figure S5.** Absorption spectra of 800RS-PMPC (solid line) and 800RS (dotted line) in water (2  $\mu\text{M}$ ).



The DLS and TEM data for ICG-PMPC obtained under conditions that were otherwise identical to those for 800RS-PMPC are shown in Fig. S6 together with those for 800RS-PMPC (Fig. 1, reproduced for comparison). Thus, in marked contrast to 800RS-PMPC, ICG-PMPC forms giant aggregates ( $d_{\text{DLS}} = 148 \pm 0.6$  nm), consistent with the TEM images.

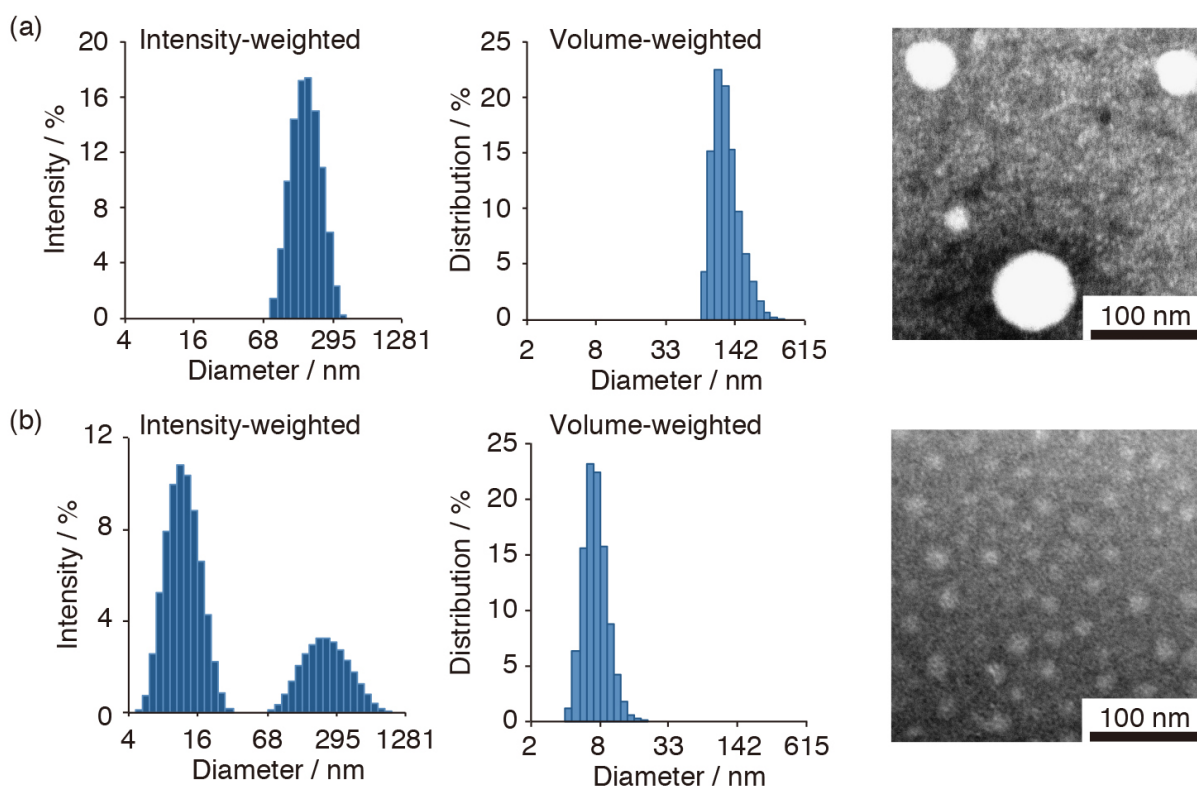

**Figure S6.** Intensity-weighted (left) and volume-weighted (middle) DLS size-distribution profiles and TEM images (right) for ICG-PMPC (a) and 800RS-PMPC (b, Fig. 1 reproduced). DLS samples (1 mg/mL H<sub>2</sub>O) were filtered through a 0.8  $\mu\text{m}$  filter just prior to measurements. TEM samples (2 mg/mL H<sub>2</sub>O) were negatively stained with phosphotungstic acid (2.8 wt%, pH 7.0).

## 2. MTT assay of the cytotoxicity of 800RS-PMPC

The cell viabilities, shown in Fig. S7 (diamonds) are  $\sim 100\%$  in the whole concentration range; the cytotoxicity of 800RS-PMPC if any must be very low as a consequence. In Fig. S7 are also shown the cell viabilities when  $\text{NH}_2$ -PMPC as a reference was used in place of 800RS-PMPC (squares).

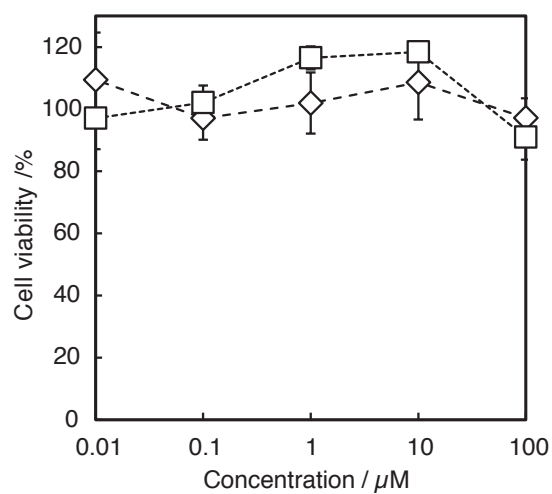

**Figure S7.** Cell viability assay (mean  $\pm$  SD,  $n = 5$ ) for 800RS-PMPC (diamond) and  $\text{NH}_2$ -PMPC (square) at 0.01–100  $\mu\text{M}$ .

### 3. QCM analysis of the interaction of 800RS-PMPC and ICG-PMPC with BSA

Conjugate 800RS-PMPC shows no detectable affinity for BSA on the sensor. In marked contrast to 800RS-PMPC, ICG-PMPC shows a noticeable affinity for serum albumin (Fig. S8).

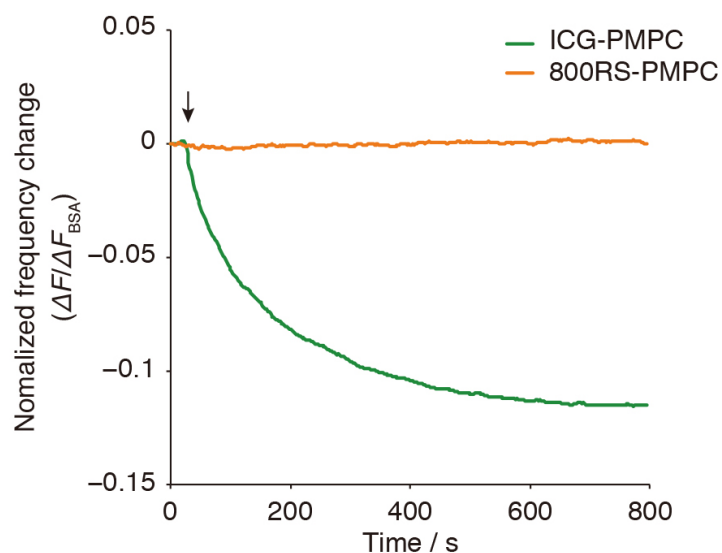

**Figure S8.** QCM sensorgrams for the adsorption of 800RS-PMPC and ICG-PMPC on a gold electrode immobilizing bovine serum albumin (BSA) at 25 °C. Time-courses of normalized changes in frequency ( $\Delta F/\Delta F_{BSA}$ ) after addition (shown by an arrow) of 800RS-PMPC (orange) or ICG-PMPC (green) (500 molar equivalents of immobilized BSA) to the electrode.  $\Delta F_{BSA}$  refers to the change in frequency upon immobilization of BSA.

#### 4. PA imaging of tumor-bearing mice treated with ICG-PMPC

A PA image for a tumor-bearing and ICG-PMPC-administered mouse under conditions that were otherwise identical to those for 800RS-PMPC is shown in Fig. S9a, which exhibits a rather continuous bright area. This is in contrast to the PA image of 800RS-PMPC-administered mouse characterized by split bright (hot) spots as shown in Figs. 4b and 5 and also in Fig. S9b as an additional example with a scale of either 1200–1600 or more clearly 1200–1400.

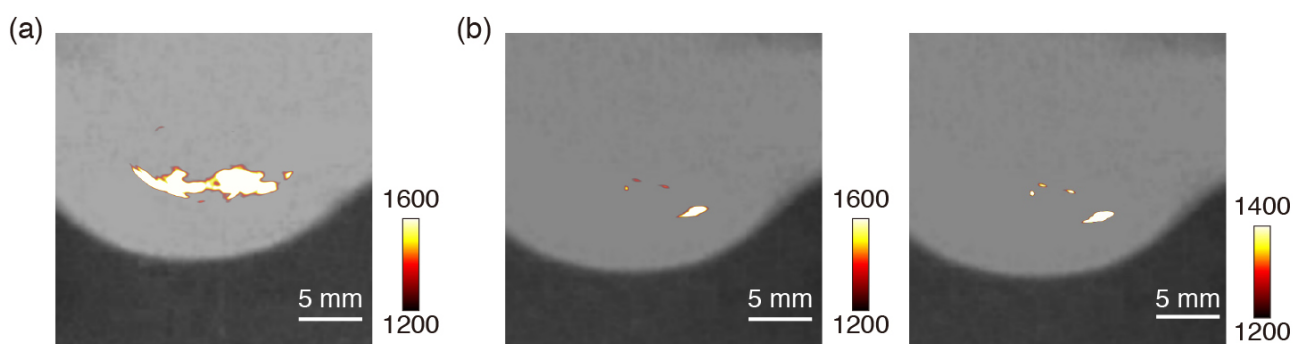

**Figure S9.** PA images of tumor-bearing ICG-PMPC-administered (a) or 800RS-PMPC-administered ( $2.0 \mu\text{mol/kg} = 40 \text{ nmol/20-g mouse}$ ) mice (b) under hemoglobin-suppressing, low-sensitivity, or high-threshold conditions.

## 5. *Ex vivo* fluorescence imaging of tumor-bearing mice treated with 800RS-PMPC and ICG-PMPC

In the case of 800RS-PMPC, strong fluorescence was detected from the tumor (Tu), in marked contrast to other tissues. When ICG-PMPC was used in place of 800RS-PMPC, strong fluorescence was detected for the liver in addition to the tumor. The tumor-to-liver fluorescence intensity ratios were 3.7 for 800RS-PMPC and 1.9 for ICG-PMPC. Quantification revealed that the probe 800RS-PMPC accumulates in the tumor with an efficiency of 4.62 nmol/g or 11.6% ID/g (ID = injected dose), as compared with 13% ID/g for the doubly  $^{13}\text{C}/^{15}\text{N}$ -labeled and self-traceable PMPC.<sup>[S1]</sup> Thus, 800RS-PMPC turned out to be more selective in tumor-targeting than ICG-PMPC.

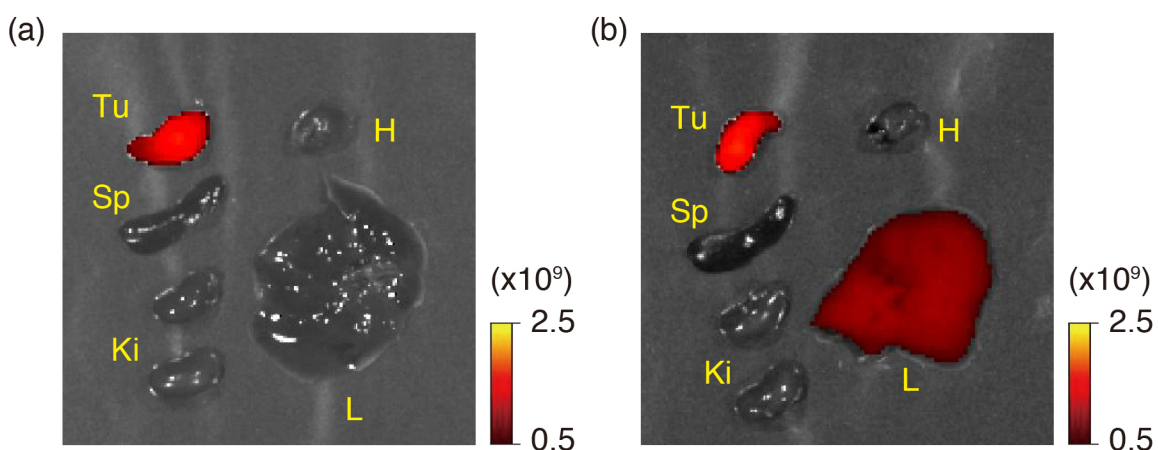

**Figure S10.** Merged fluorescence and bright-field images for the tumor (Tu), liver (L), kidney (Ki), spleen (Sp), and heart (H) taken from mice 48 h after administration of 800RS-PMPC (a) or ICG-PMPC (b) ( $1.0 \mu\text{mol}/\text{kg} = 20 \text{ nmol}/20\text{-g mouse}$ ). Excitation and detection wavelengths are 745 nm and 850 nm, respectively. The scale shows radiant efficiency ( $[\text{photon}/\text{sec}/\text{cm}^2/\text{sr}]/[\mu\text{W}/\text{cm}^2]$ ).

## 6. References

[S1] Yamada, H. *et al.* Magnetic resonance imaging of tumor with a self-traceable phosphorylcholine polymer. *J. Am. Chem. Soc.* **137**, 799–806 (2015).
